# Supplementary material for: Visual Sensing And Controlling of The Keyhole In Robotic Plasma Arc Welding
Source: Research Square preprint supplement (doi:10.21203/rs.3.rs-1337880/v1), 2022-02-11
Supplement: Supplementary file 1 [file 6d4540e7a5bb8e7d5b7a084d.docx]

**Declaration of Interest Statement**

We declare that we have no financial and personal relationships with other people or organizations that can inappropriately influence our work, there is no professional or other personal interest of any nature or kind in any product, service and/or company that could be construed as influencing the position presented in, or the review of, the manuscript entitled.
